# Supplementary material for: Mechanistic insight into the azo radical-promoted dehydrogenation of heteroarene towards N-heterocycles
Source: Royal Society of Chemistry journal article supplement (doi:10.1039/d0cy01008a), 2020-01-01
Supplement: d0cy01008a1.pdf [file d0cy01008a1.pdf]

## Electronic Supplementary Information

### Mechanistic insight into an azo-radical promoted dehydrogenation of heteroarene towards N-heterocycles.

*Amreen K. Bains<sup>a</sup>, Debashis Adhikari<sup>\*a</sup>*

<sup>a</sup>Department of Chemical Sciences, Indian Institute of Science Education and Research Mohali, SAS Nagar-140306, India.

E-mail: [adhikari@iisermohali.ac.in](mailto:adhikari@iisermohali.ac.in)

#### Table of Contents

1. Optimization Table
2. Control experiments
  - 2.A. Intermediate tracking and isolation
  - 2.B. Radical quenching experiment
  - 2.C. Procedure for the adduct formation of pyrimidinyl radical
  - 2.D. Detection of H<sub>2</sub>O<sub>2</sub>
  - 2.E. Mercury drop test
3. Kinetics analysis
  - 3.A. Kinetic analysis for dehydrogenative aromatization of **4** varying reaction conditions
  - 3.B. Aromatic dehydrogenation of **4** at three different temperature
  - 3.C. Saturation kinetics for aromatic dehydrogenation of **4** at three different temperature
4. <sup>1</sup>H and <sup>13</sup>C NMR spectra
5. Reference

## 1. Optimization table

**Table S1: Optimization of reaction conditions for pyrimidine synthesis**

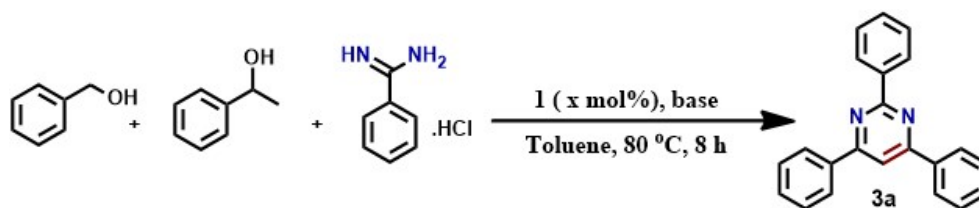

| Entry           | Catalyst            | Base                           | Yield (%) |
|-----------------|---------------------|--------------------------------|-----------|
|                 |                     |                                | <b>3a</b> |
| 1               | -                   | KO <sup>t</sup> Bu             | 15        |
| 2               | <b>1</b>            | KO <sup>t</sup> Bu (0.1eq)     | 33        |
| 3               | <b>1</b>            | KO <sup>t</sup> Bu (0.25eq)    | 66        |
| 4               | <b>1</b>            | KO <sup>t</sup> Bu (0.5eq)     | 90        |
| 5               | <b>1</b> (2.5 mol%) | KO <sup>t</sup> Bu             | 61        |
| 6               | <b>1</b> (7 mol%)   | KO <sup>t</sup> Bu             | 91        |
| 7               | <b>1</b> (5 mol%)   | KOH                            | 35        |
| 8               | <b>1</b> (5 mol%)   | K <sub>2</sub> CO <sub>3</sub> | n.r       |
| 9 <sup>a</sup>  | <b>1</b> (5 mol%)   | KO <sup>t</sup> Bu             | 60        |
| 10 <sup>b</sup> | <b>1</b> (5 mol%)   | KO <sup>t</sup> Bu             | 82        |
| 11 <sup>c</sup> | <b>1</b> (5 mol%)   | KO <sup>t</sup> Bu             | 19        |
| 12 <sup>d</sup> | <b>1</b> (5 mol%)   | KO <sup>t</sup> Bu             | 60        |
| 13 <sup>e</sup> | <b>1</b> (5 mol%)   | KO <sup>t</sup> Bu             | 45        |
| 14 <sup>f</sup> | <b>1</b> (5 mol%)   | KO <sup>t</sup> Bu             | 92        |
| 15              | <b>1</b>            | -                              | n.r       |

*Reaction condition: 1 (5 mol%), benzyl alcohol (1 mmol), 1-phenyl ethanol (1.25 mmol), benzamidine (1 mmol), base (0.5 mmol), toluene (2 mL), 80 °C, O<sub>2</sub> balloon, 8 h (isolated yield). <sup>a</sup>Reaction temperature 80 °C, without O<sub>2</sub> balloon, <sup>b</sup>Reaction temperature 100 °C, without O<sub>2</sub> balloon, <sup>c</sup>inert atmosphere, <sup>d</sup>oxygenated toluene as solvent, <sup>e</sup>Reaction time: 6 h, <sup>f</sup>Reaction time: 12 h.*

## 2. Control experiments

### Scheme S1. Plausible pathway for 1,3,5 -triazine formation

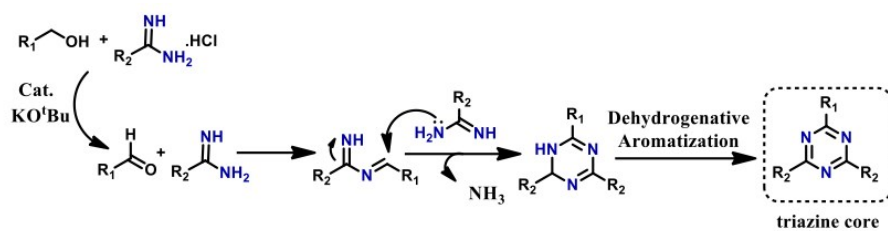

### Scheme S2. Plausible pathway for pyrimidine formation

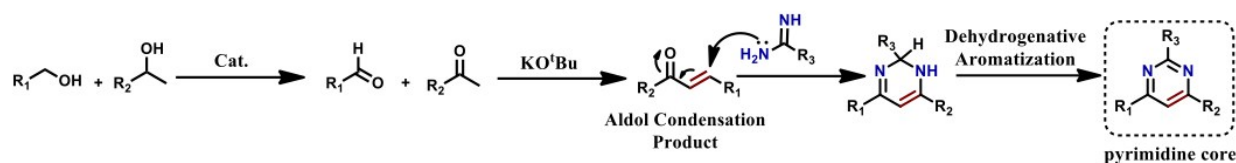

## 2.A. Tracking of intermediates and isolation

### A.1.

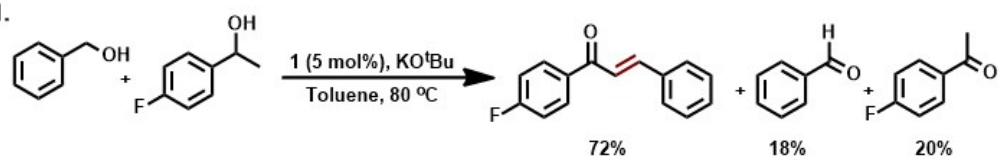

In a 5 mL vial, benzyl alcohol (1 mmol), 1-(4-fluorophenyl)ethanol (1 mmol),  $KOtBu$  (0.5 mmol), **1** (5 mol%) were added followed by 2 mL toluene. The reaction mixture was stirred at  $80\text{ }^{\circ}C$  for 5 h. Aldol condensation product (chalcone) was observed in 72% yield.

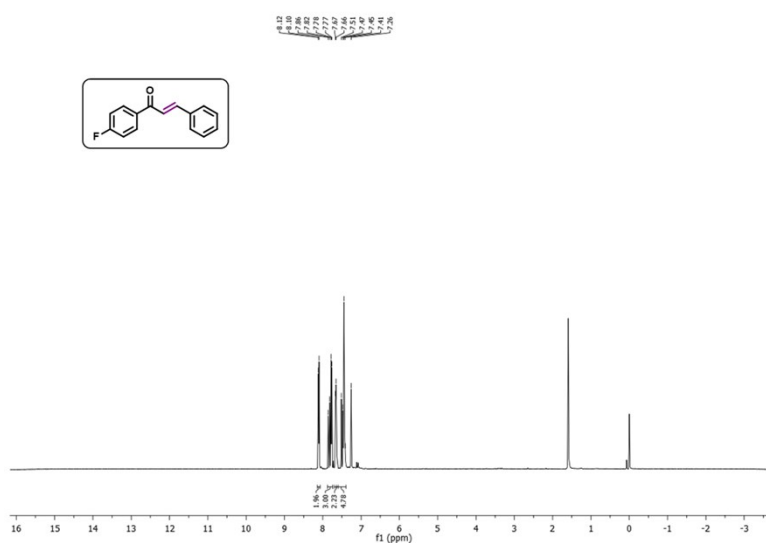

**Figure S1.** <sup>1</sup>H NMR spectrum (400 MHz) of 1-(4-fluorophenyl)-3-phenylprop-2-en-1-one in  $CDCl_3$ .

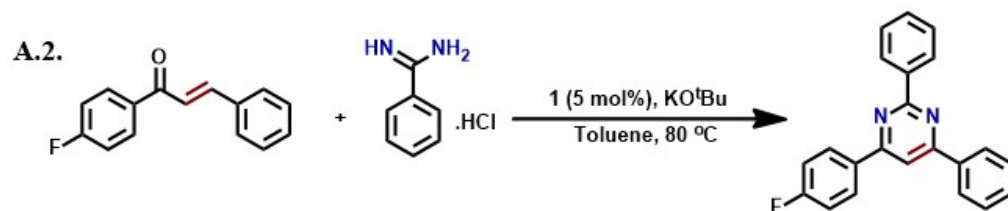

In a 5 mL vial, pre-synthesized aldol condensation product chalcone (1 mmol), benzamidine (1 mmol), KO<sup>t</sup>Bu (0.5 mmol), **1** (5 mol%) were added followed by 2 mL toluene. The reaction mixture was stirred at 80 °C for 5 h with O<sub>2</sub> balloon. 2,4,6-triphenyl-pyrimidine was observed as desired product in 89% yield.

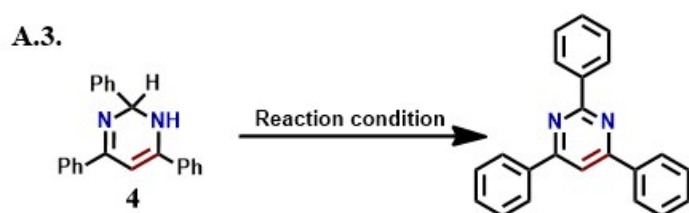

**4** (1 mmol), KO<sup>t</sup>Bu (0.5 mmol), **1** (5 mol%) was taken in 2 mL toluene. The reaction mixture was stirred at 80 °C for 5 h with O<sub>2</sub> balloon. 2,4,6-triphenyl-pyrimidine was isolated in 80% yield, concluding that **4** is the purported intermediate that leads to pyrimidine via dehydrogenative aromatization.

Subsequently, other controls were performed. The observation is given in the following table.

**Table S2: Pyrimidine formation under different reaction conditions**

| S.No | Reaction Condition            | (Pyrimidine)Yield (%) |
|------|-------------------------------|-----------------------|
| 1.   | Standard reaction condition   | 83%                   |
| 2.   | Without catalyst (at 80 °C)   | 18%                   |
| 3.   | Without base                  | 0%                    |
| 4.   | Inert condition               | 11%                   |
| 5.   | NiCl <sub>2</sub> as catalyst | 15%                   |

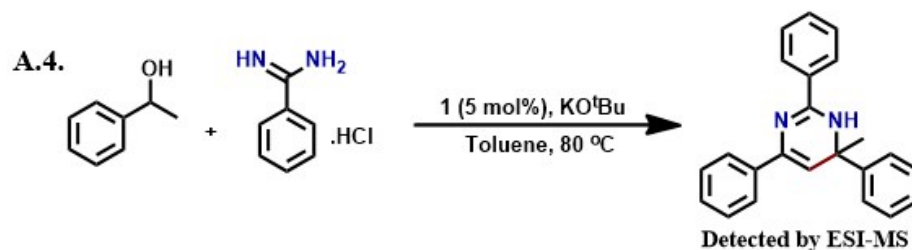

In a 5 mL vial, 1-phenylethanol (2.25 mmol), benzamidine (1 mmol), KO<sup>t</sup>Bu (0.5 mmol), **1** (5 mol%) were added followed by 2 mL toluene. The reaction solution was stirred at 80 °C for 8 h with O<sub>2</sub> balloon. Desired product 2-methyl-2,4,6-triphenyl-1,2-dihydropyrimidine was characterised by ESI-MS. (M+H<sup>+</sup> = 325.1710).

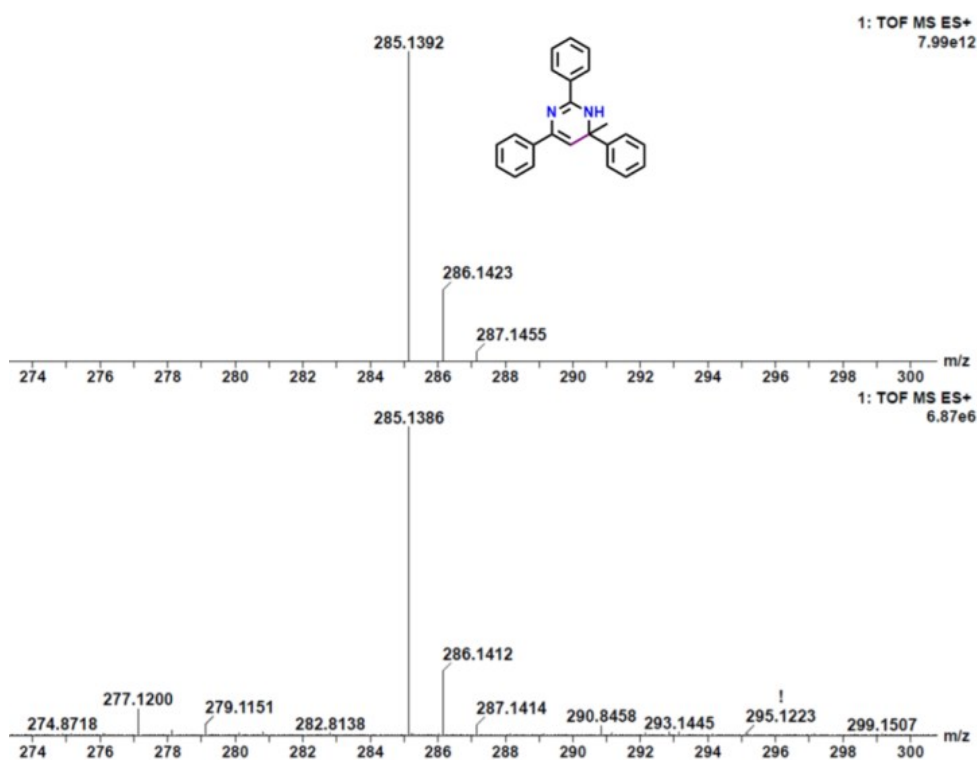

**Figure S2.** Mass spectrum of 2-methyl-2,4,6-triphenyl-1,2-dihydropyrimidine.

## 2.B. Radical quenching experiment

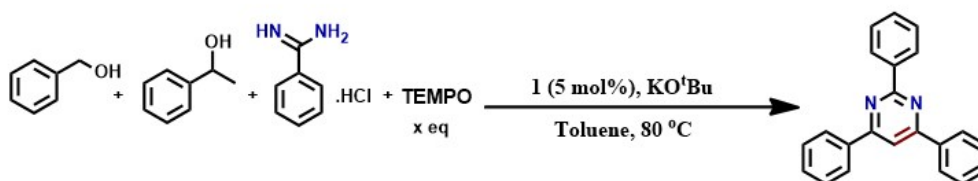

**Table S3: Product yield upon varying equivalence of radical quencher**

| S.No | TEMPO equivalence | Yield (%) |
|------|-------------------|-----------|
| 1.   | 1.0 eq            | 35%       |
| 2.   | 2.0 eq            | 18%       |

Benzyl alcohol (1 mmol), 1-phenylethanol (1.25 mmol), benzamidine hydrochloride (1 mmol), KO<sup>t</sup>Bu (0.5 mmol), **1** (5 mol%) and varying equivalent of TEMPO, followed by 2 mL toluene were added. The reaction mixture was stirred at 80 °C for 8 h under 1 atm of O<sub>2</sub>, kept as a O<sub>2</sub>-filled balloon. The pyrimidine product yield decreased with addition of TEMPO.

### TEMPO quenching during dehydrogenation of **4**

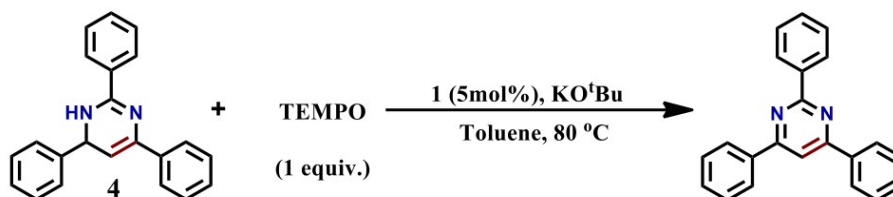

In a 5 mL vial, **4** (1 mmol), KO<sup>t</sup>Bu (0.5 mmol), **1** (5 mol%), and 1 mmol of TEMPO were added followed by 2 mL toluene. The resulting solution was kept under a balloon filled with O<sub>2</sub>. The reaction mixture was stirred for 5 h at 80 °C. The reaction mixture was cooled to room temperature and concentrated *in vacuo*. The desired product 2,4,6-triphenylpyrimidine was observed in 5% yield.

### 2.C. Procedure for the pyrimidinyl radical -TEMPO adduct

In a 5 mL vial, **4** (1 mmol), KO<sup>t</sup>Bu (0.5 mmol), **1** (5 mol%) were taken in 5 mL toluene. After stirring the reaction mixture for 15 minutes, 0.6 equiv TEMPO (0.6 mmol) was added to the reaction mixture and the solution was kept on stirring at 80 °C for 5 h. The arrested radical by the formation of TEMPO-adduct was characterised by ESI-MS. ( $M-H^+ = 464.2616$ ).

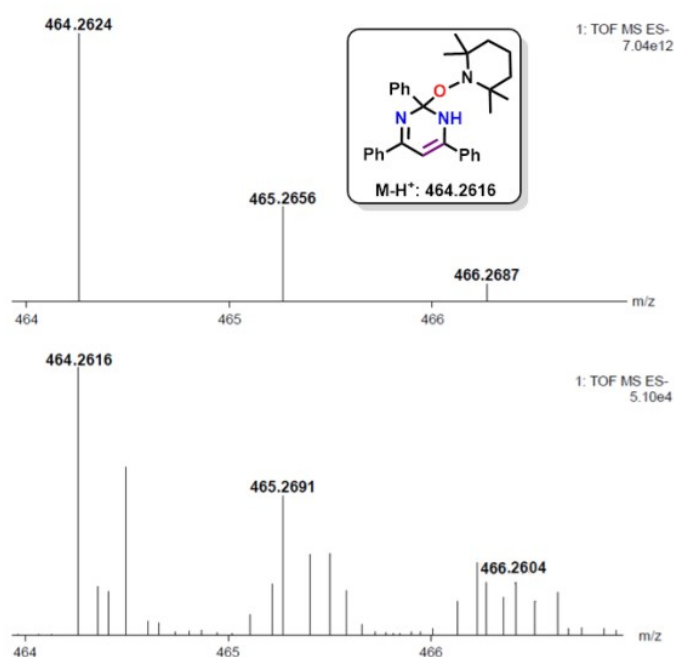

**Figure S3.** Mass spectrum of pyrimidinyl radical -TEMPO adduct.

## 2.D. Detection of H<sub>2</sub>O<sub>2</sub>

For oxidation of alcohols, presence of H<sub>2</sub>O<sub>2</sub> in the reaction mixture was analyzed by UV–Vis spectroscopy<sup>s1</sup> using the iodometric assay.

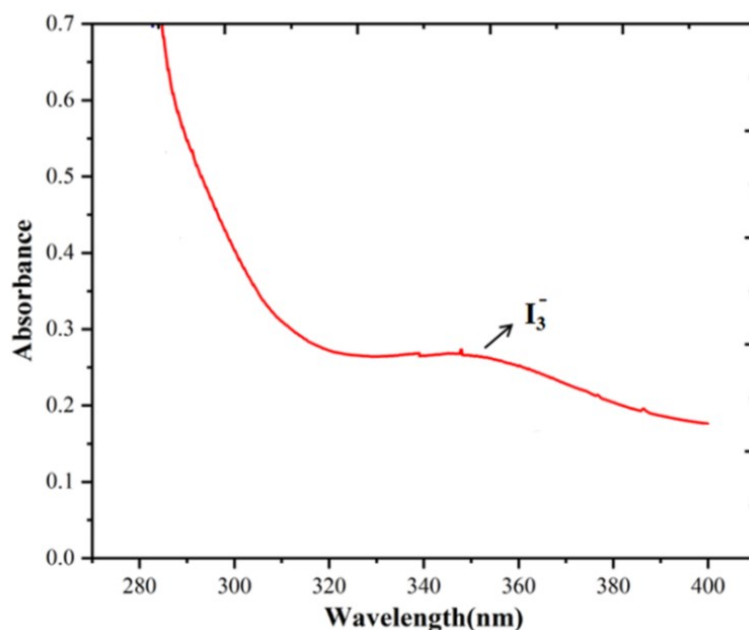

**Figure S4.** UV-Visible spectrum of I<sub>3</sub><sup>-</sup> ion formation in presence of H<sub>2</sub>O<sub>2</sub>.

## 2.E. Mercury drop test

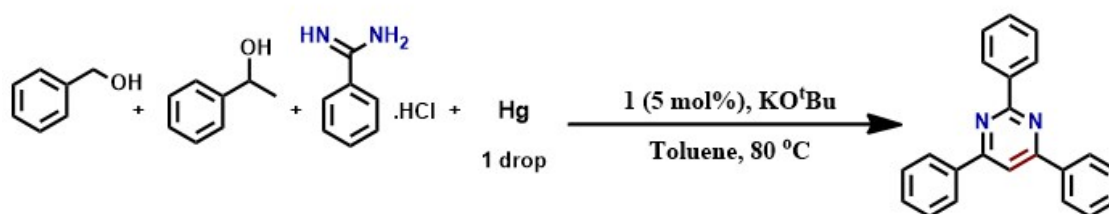

To establish the homogeneous catalytic condition in the reaction, we have carried out mercury drop experiment. In a typical mercury drop test, 5 mL vial was charged benzyl alcohol (1 mmol), 1-phenylethanol (1.25 mmol), benzamidine hydrochloride (1 mmol), KO<sup>t</sup>Bu (0.5 mmol) and 5 mol% of **1** followed by 2 mL toluene. To this reaction mixture, a drop of mercury was added and was closed with rubber septum. The resulting solution was sparged with O<sub>2</sub>. The reaction mixture was stirred at 80 °C for 8 h. The isolation of the product (in 72% yield) after 8 h confirmed the homogeneous behaviour of the catalyst in solution.

### 3. The kinetics analysis

The kinetic experiments were analyzed by UV–Vis spectroscopy.

#### 3.A. Kinetic analysis for dehydrogenative aromatization of **4** varying reaction conditions

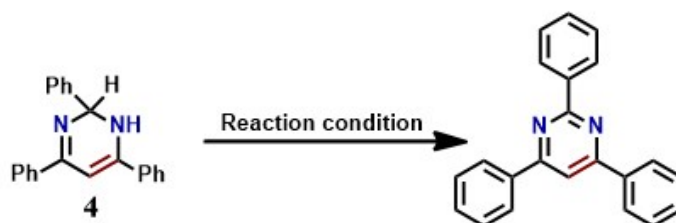

- A) Reaction conditions:** **1** (5 mol%), **4** (1 mmol), KO<sup>t</sup>Bu (0.5 mmol), toluene (2 mL), 80 °C, O<sub>2</sub> balloon, 8 h. (Optimized reaction conditions)
- B) Reaction conditions:** **4** (1 mmol), KO<sup>t</sup>Bu (0.5 mmol), toluene (2 mL), 80 °C, O<sub>2</sub> balloon, 8 h. (Absence of catalyst)
- C) Reaction conditions:** **4** (1 mmol), KO<sup>t</sup>Bu (0.5 mmol), toluene (2 mL), 140 °C, 8 h. (Absence of catalyst and O<sub>2</sub> balloon)

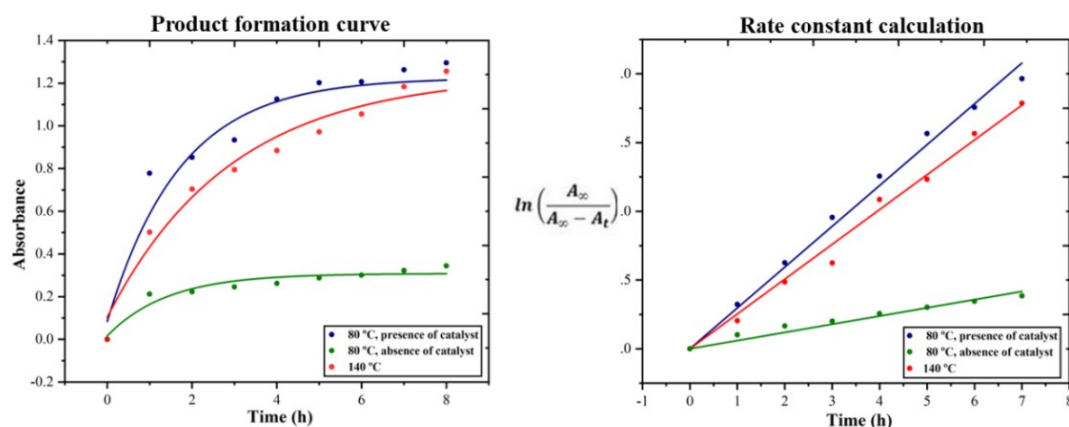

**Figure S5.** Kinetic analysis (by UV–Vis spectroscopy) for pyrimidine formation.

### 3.B. Aromatic dehydrogenation of 4 at three different temperature

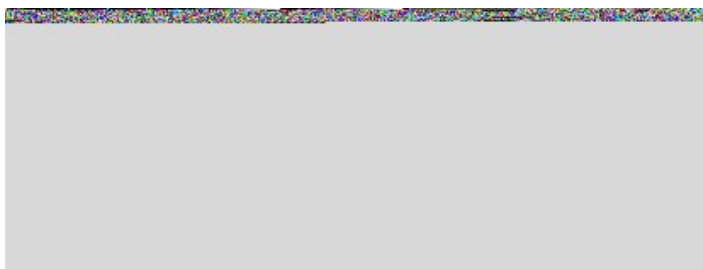

**Reaction conditions:** **1** (5 mol%), **4** (1 mmol), KO<sup>t</sup>Bu (0.5 mmol), toluene (2 mL), 70-90 °C, O<sub>2</sub> balloon, 8 h.

**Set 1:**

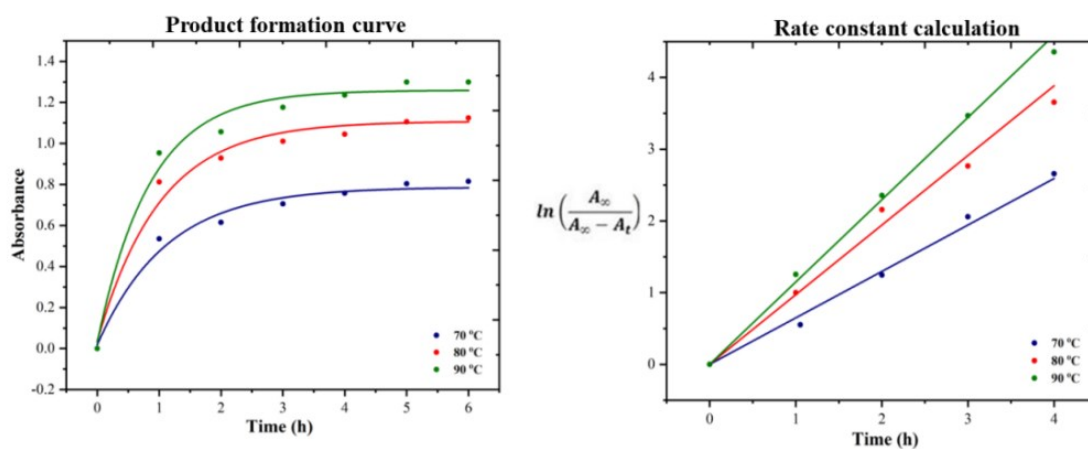

**Figure S6.** Kinetic analysis (by UV–Vis spectroscopy) for pyrimidine formation at 70 °C, 80 °C and 90 °C.

**Set 2:**

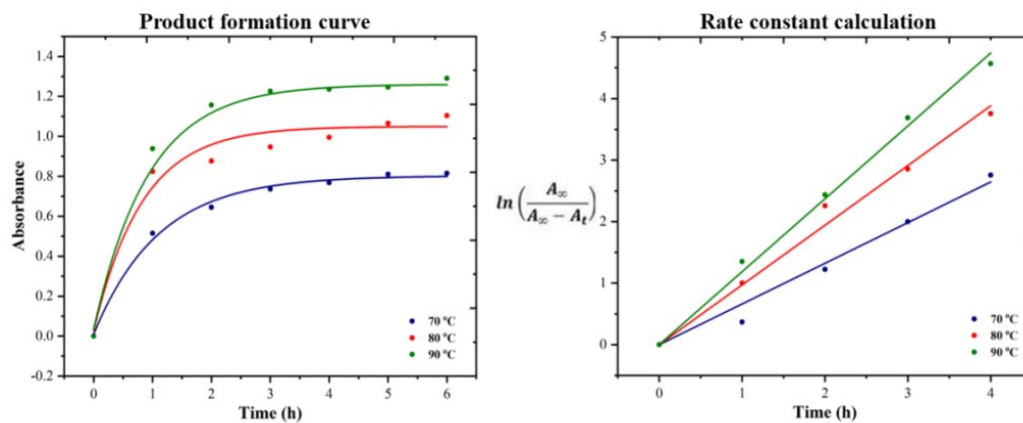

**Figure S7.** Kinetic analysis (by UV–Vis spectroscopy) for pyrimidine formation at 70 °C, 80 °C and 90 °C.

### 3.C. Saturation kinetics for aromatic dehydrogenation of 4 at three different temperatures

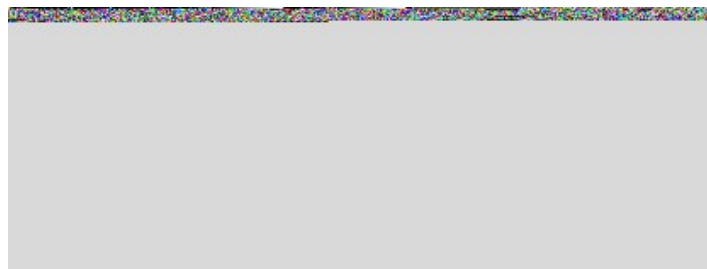

**Reaction conditions:** **1** (5 mol%), **4** (0.3 M, 0.6 M, 0.9 M, 1.2 M, 1.5 M), KO<sup>t</sup>Bu (0.5 mmol), toluene (2 mL), 70 °C, 80 °C, 90 °C, O<sub>2</sub> balloon, 8 h.

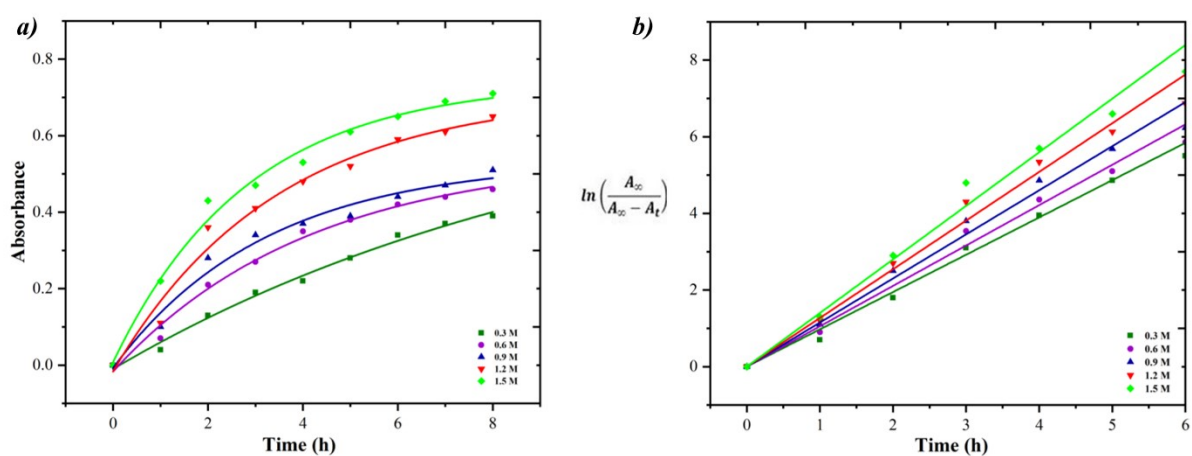

**Figure S8.** Kinetic analysis (by UV–Vis spectroscopy) for pyrimidine formation at 70 °C.

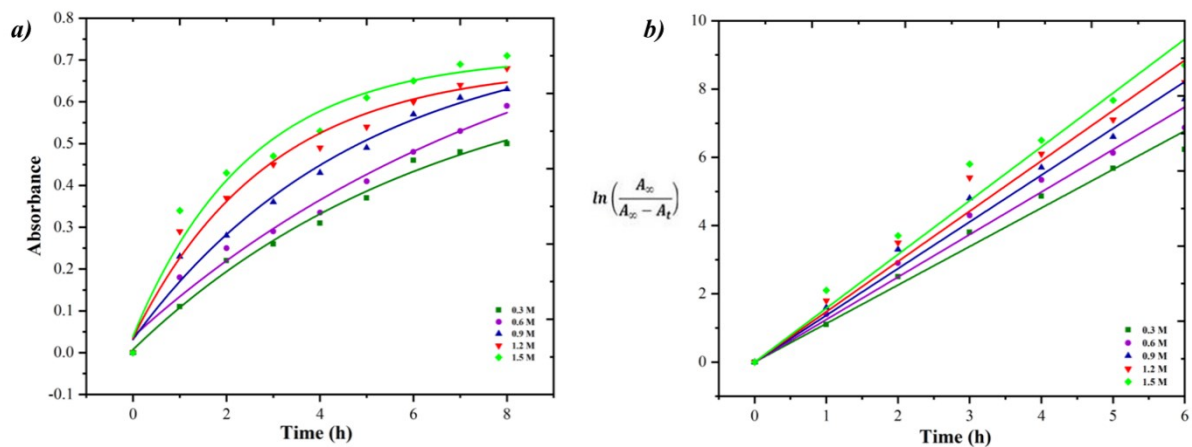

**Figure S9.** Kinetic analysis (by UV–Vis spectroscopy) for pyrimidine formation at 80 °C.



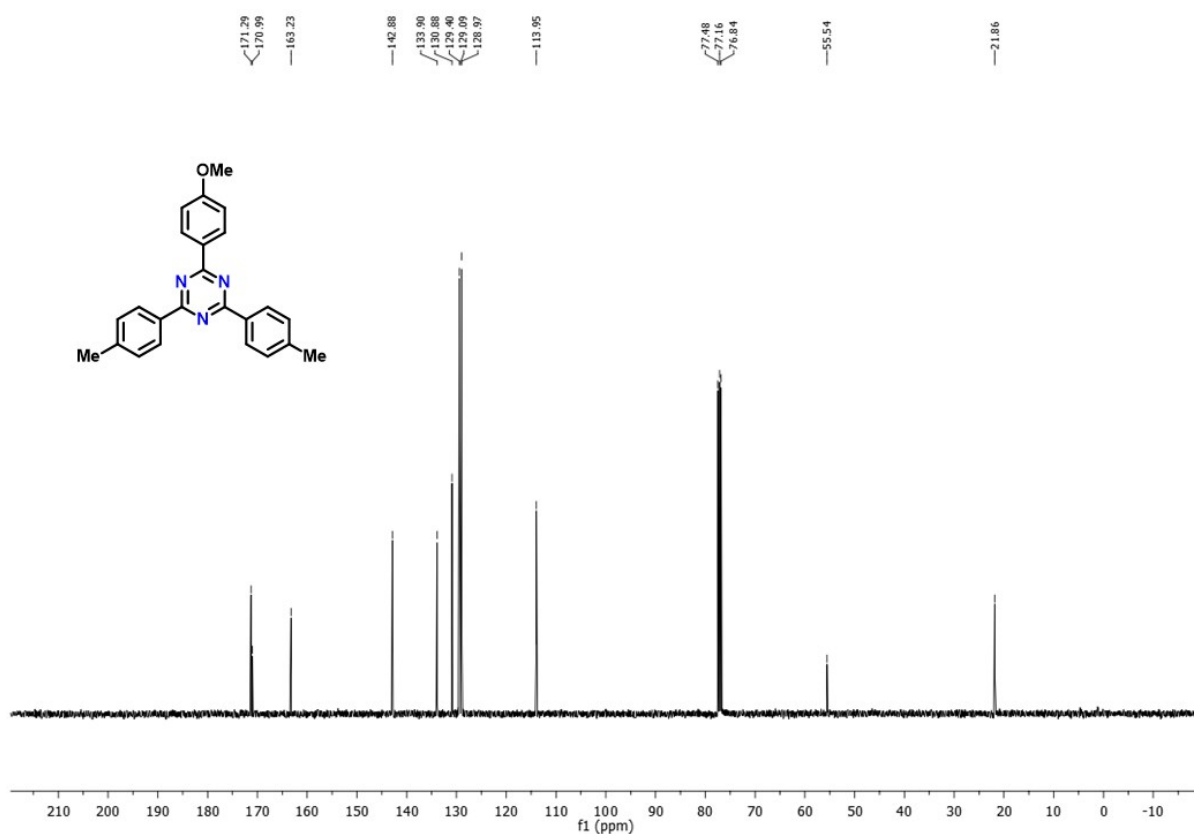

**Figure S12.** <sup>13</sup>C NMR spectrum (100 MHz) of **2b** in CDCl<sub>3</sub>.

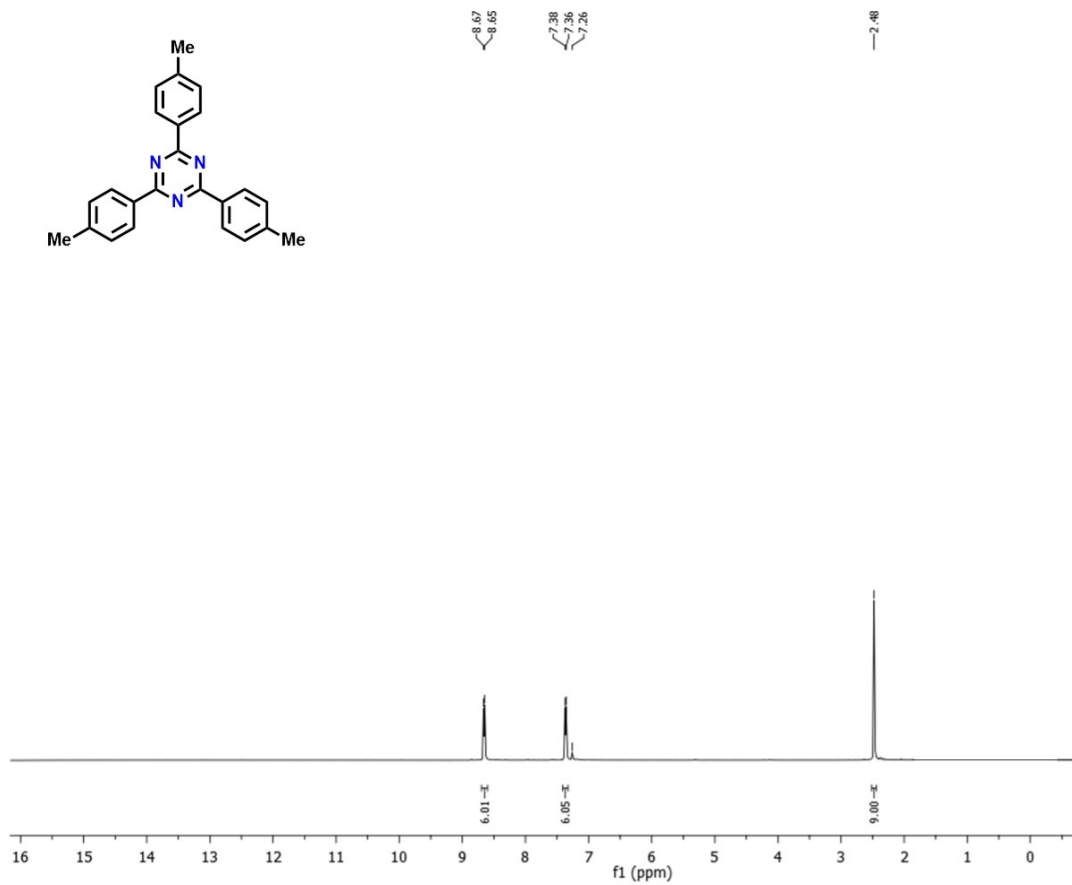

**Figure S13.**  $^1\text{H}$  NMR spectrum (400 MHz) of **2c** in  $\text{CDCl}_3$ .

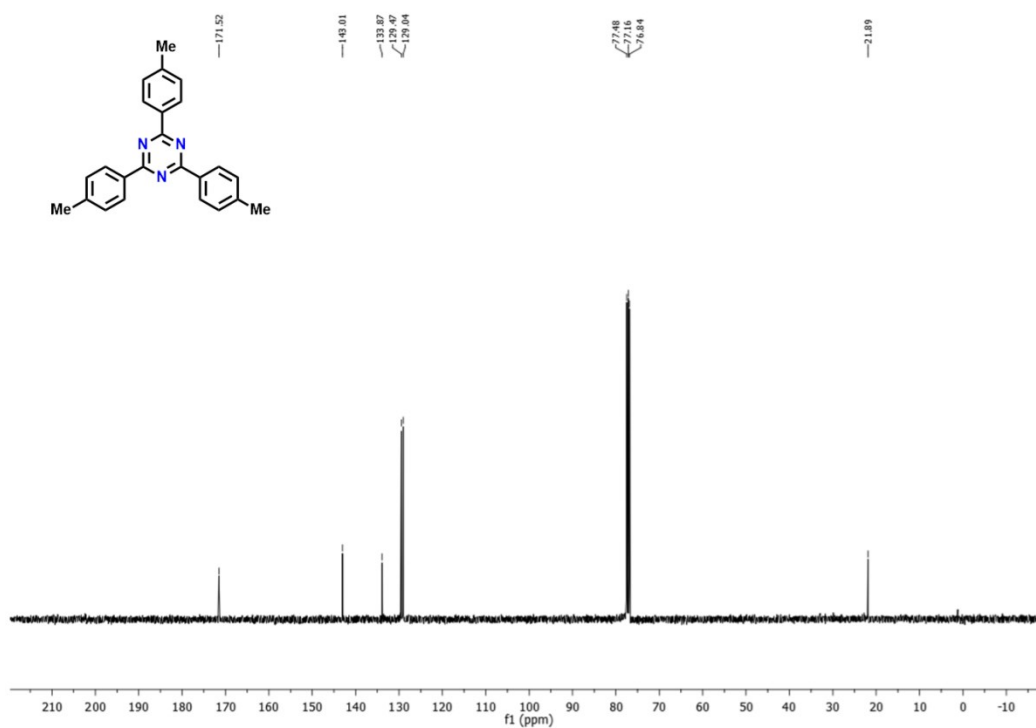

**Figure S14.**  $^{13}\text{C}$  NMR spectrum (100 MHz) of **2c** in  $\text{CDCl}_3$ .

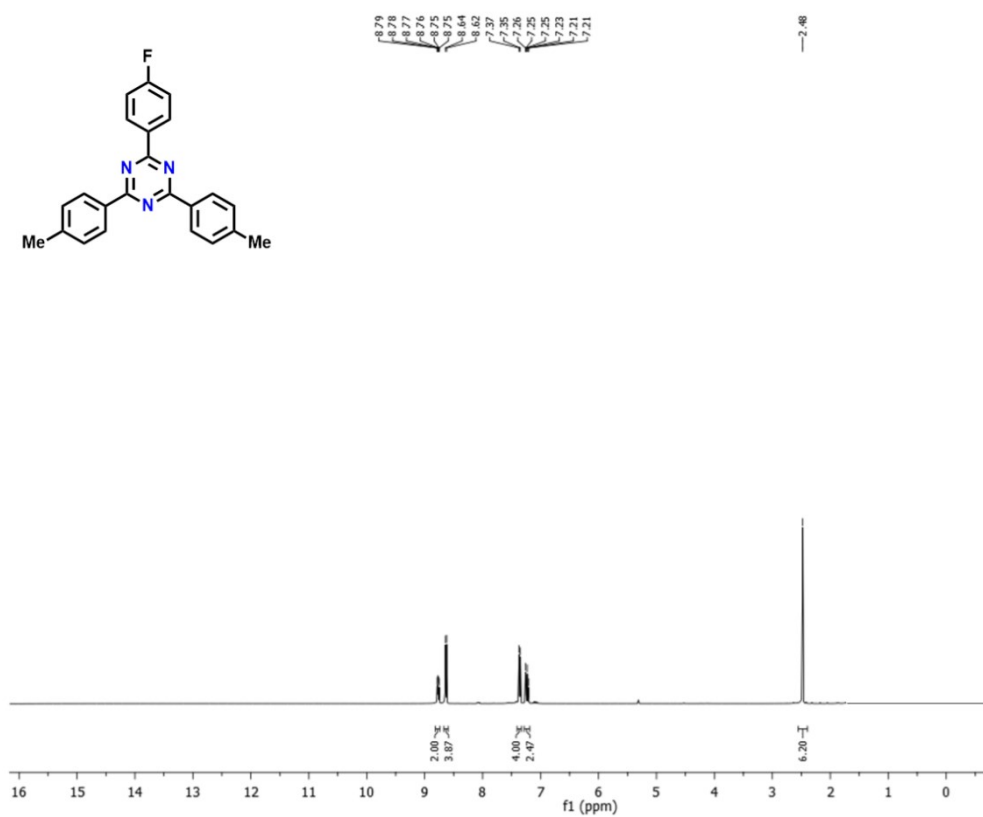

**Figure S15.**  $^1\text{H}$  NMR spectrum (400 MHz) of **2d** in  $\text{CDCl}_3$ .

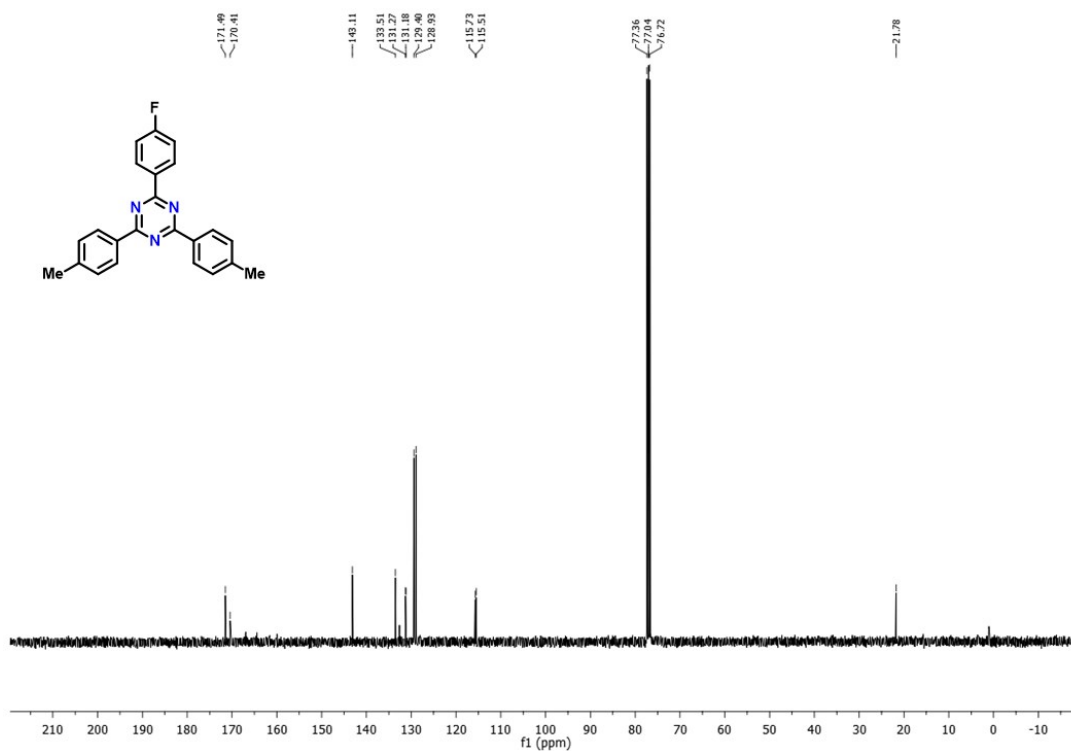

**Figure S16.** <sup>13</sup>C NMR spectrum (100 MHz) of **2d** in CDCl<sub>3</sub>.

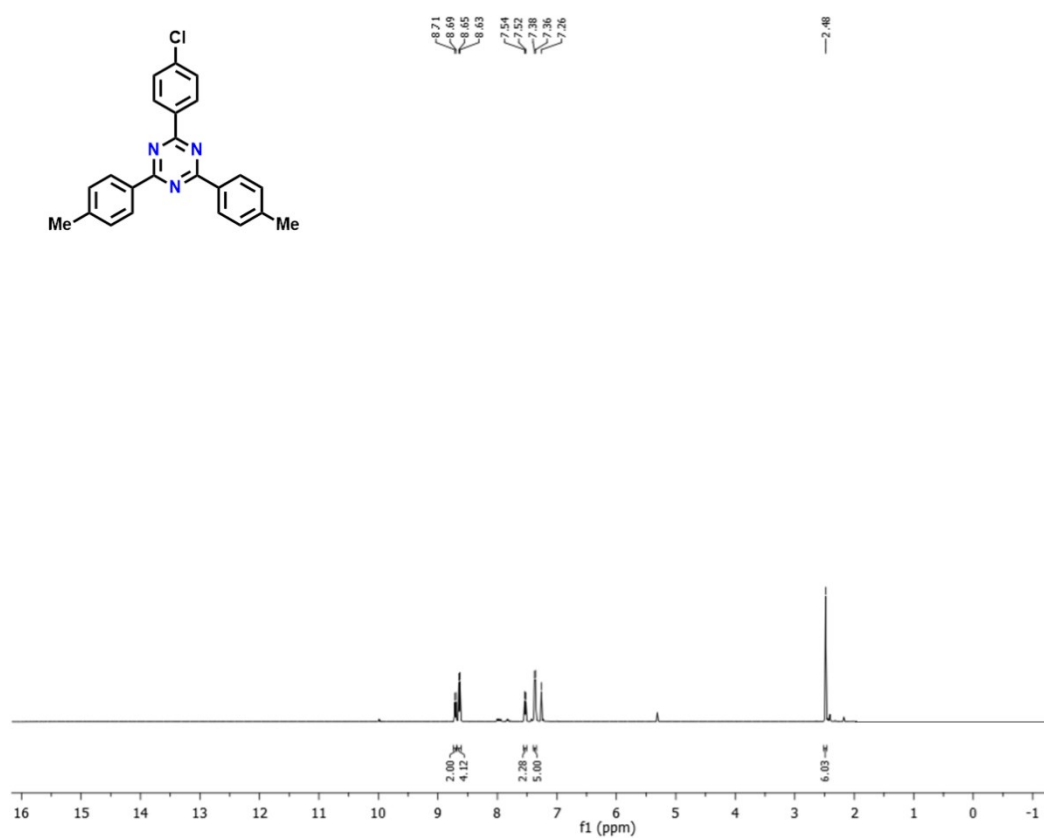

**Figure S17.** <sup>1</sup>H NMR spectrum (400 MHz) of **2e** in CDCl<sub>3</sub>.

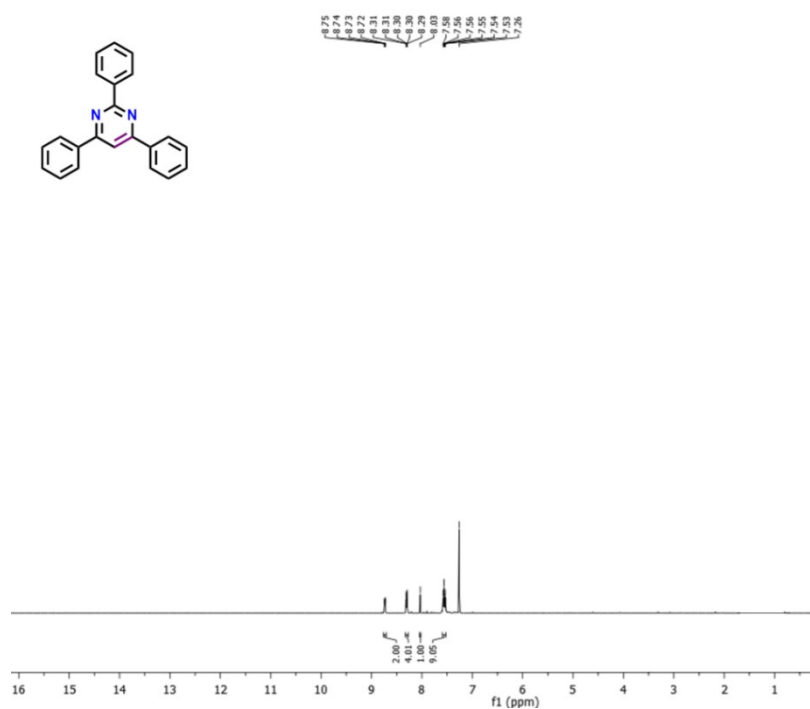

**Figure S18.** <sup>1</sup>H NMR spectrum (400 MHz) of **3a** in CDCl<sub>3</sub>.

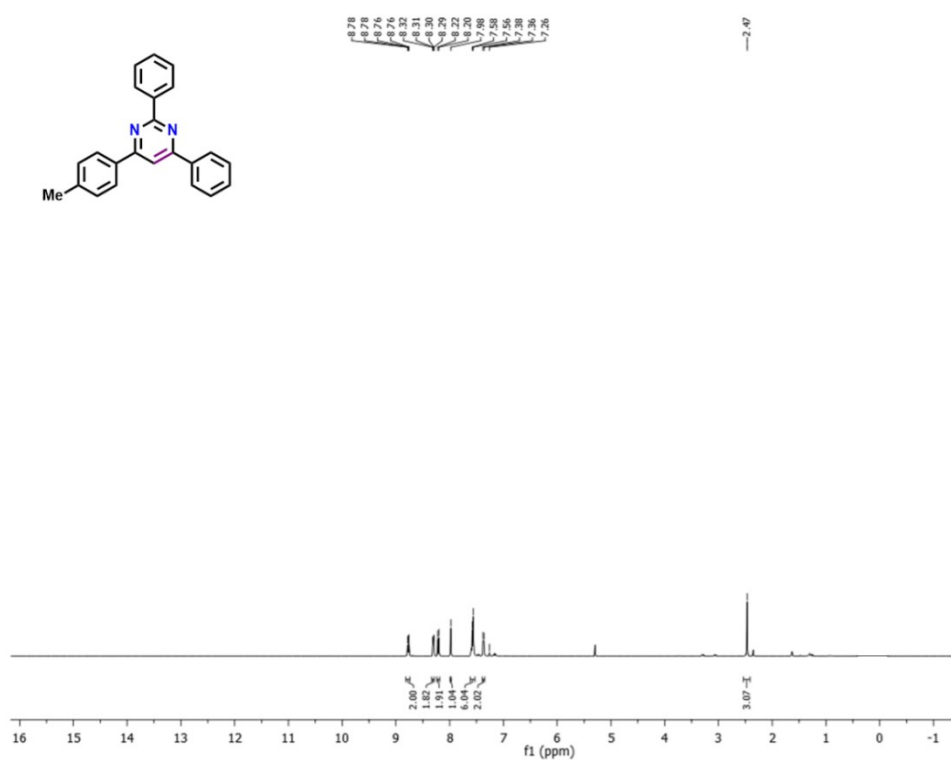

**Figure S19.** <sup>1</sup>H NMR spectrum (400 MHz) of **3b** in CDCl<sub>3</sub>.

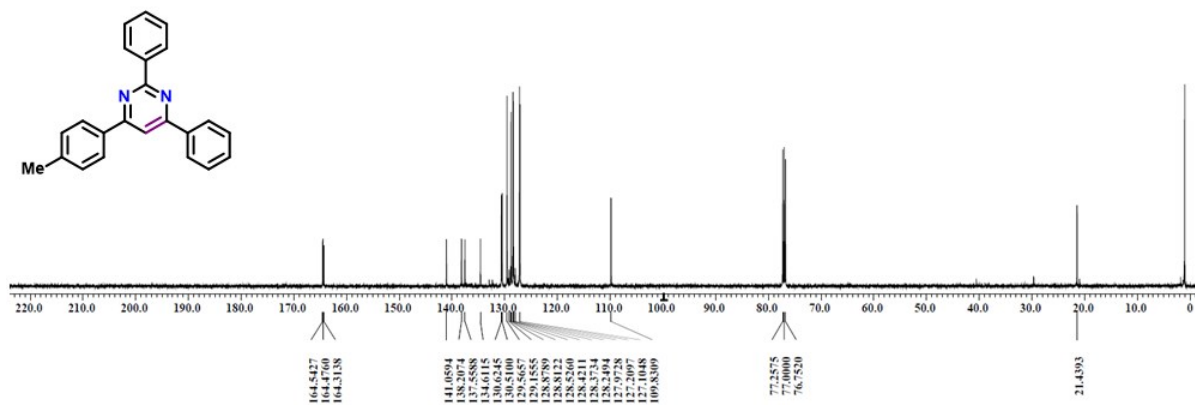

**Figure S20.** <sup>13</sup>C NMR spectrum (100 MHz) of **3b** in CDCl<sub>3</sub>.

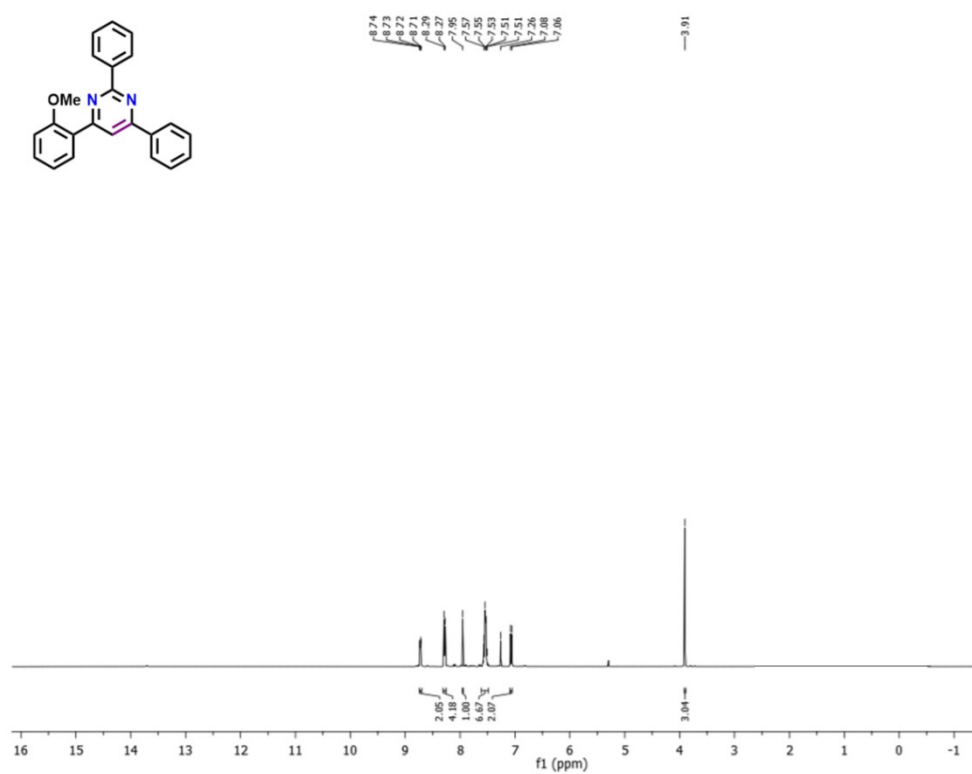

**Figure S21.** <sup>1</sup>H NMR spectrum (400 MHz) of **3c** in CDCl<sub>3</sub>.

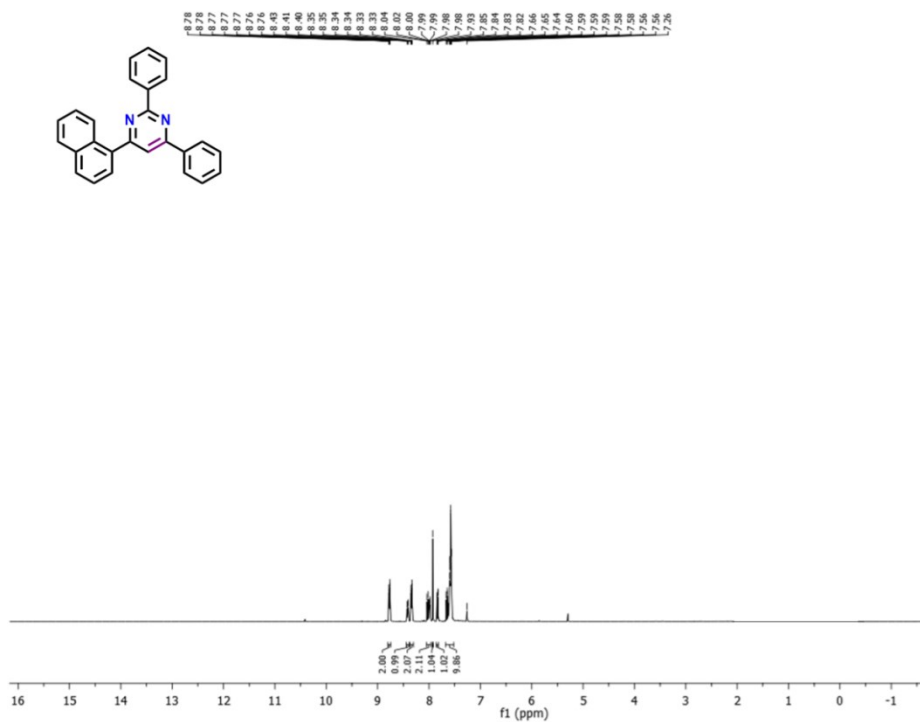

**Figure S22.** <sup>1</sup>H NMR spectrum (400 MHz) of **3d** in CDCl<sub>3</sub>.

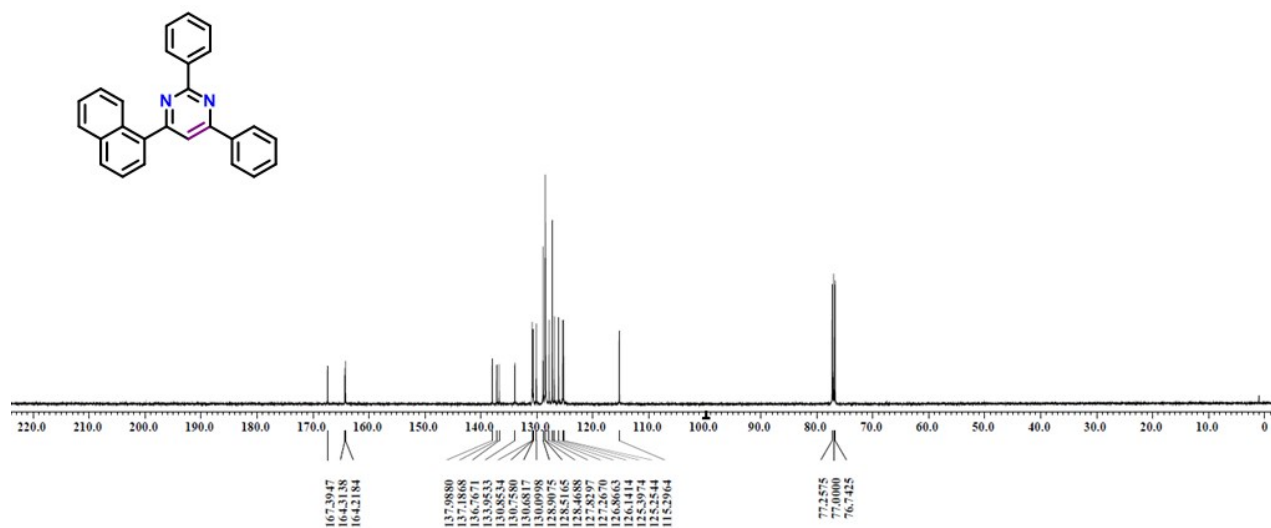

**Figure S23.** <sup>13</sup>C NMR spectrum (100 MHz) of **3d** in CDCl<sub>3</sub>.

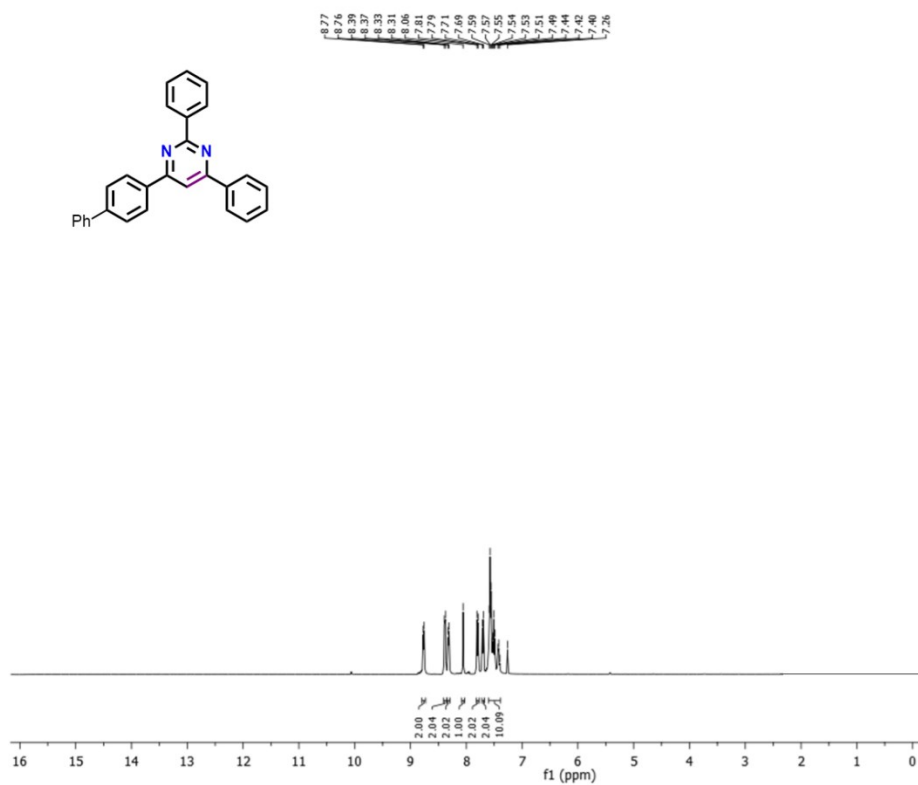

**Figure S24.** <sup>1</sup>H NMR spectrum (400 MHz) of **3e** in CDCl<sub>3</sub>.

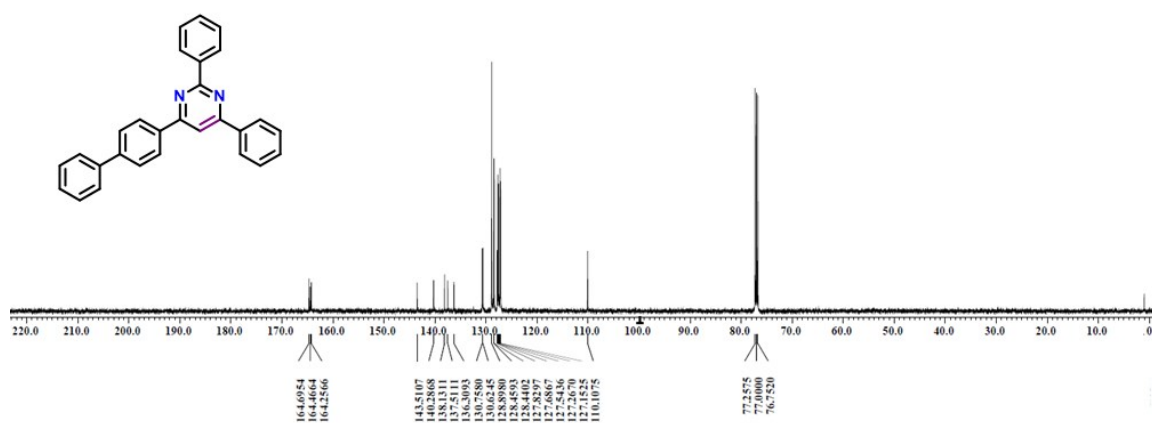

**Figure S25.** <sup>13</sup>C NMR spectrum (100 MHz) of **3e** in CDCl<sub>3</sub>.

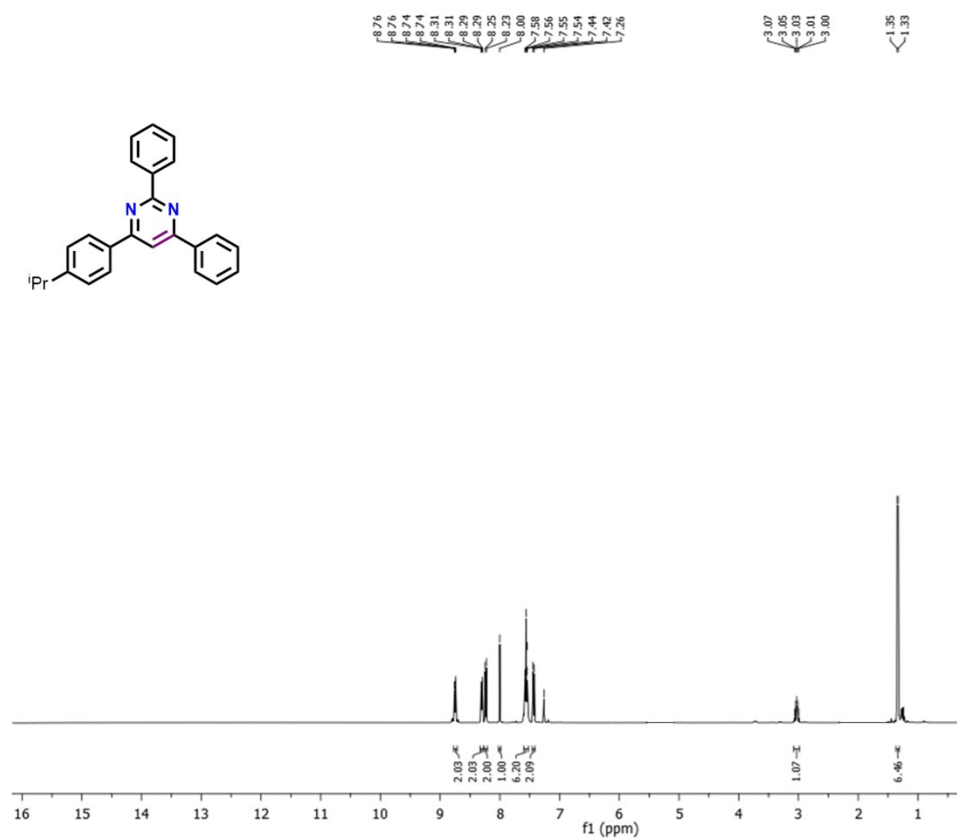

**Figure S26.** <sup>1</sup>H NMR spectrum (400 MHz) of **3f** in CDCl<sub>3</sub>.

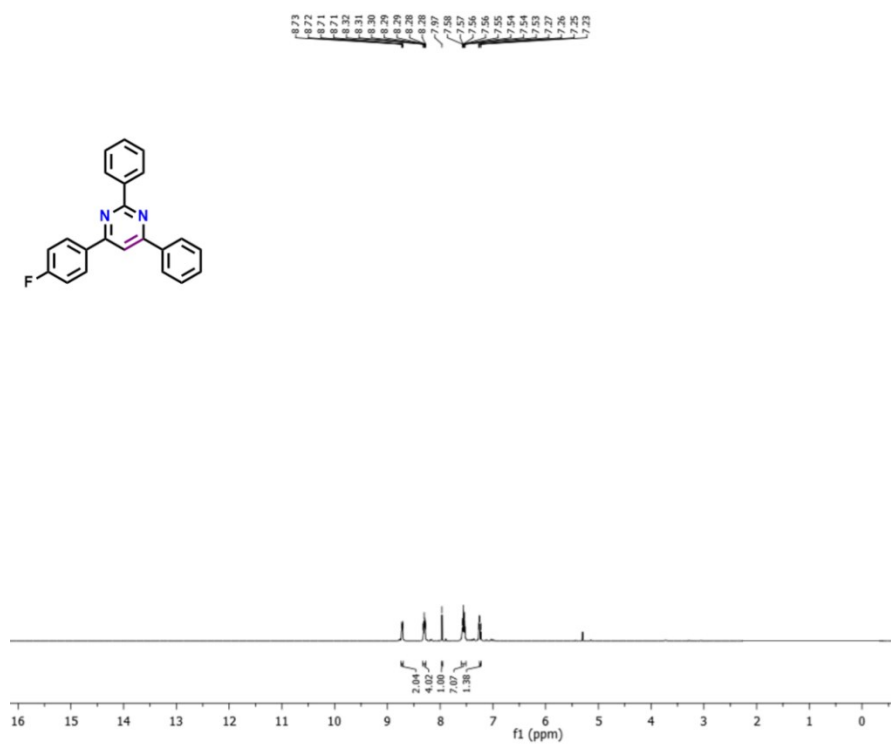

**Figure S27.** <sup>1</sup>H NMR spectrum (400 MHz) of **3g** in CDCl<sub>3</sub>.

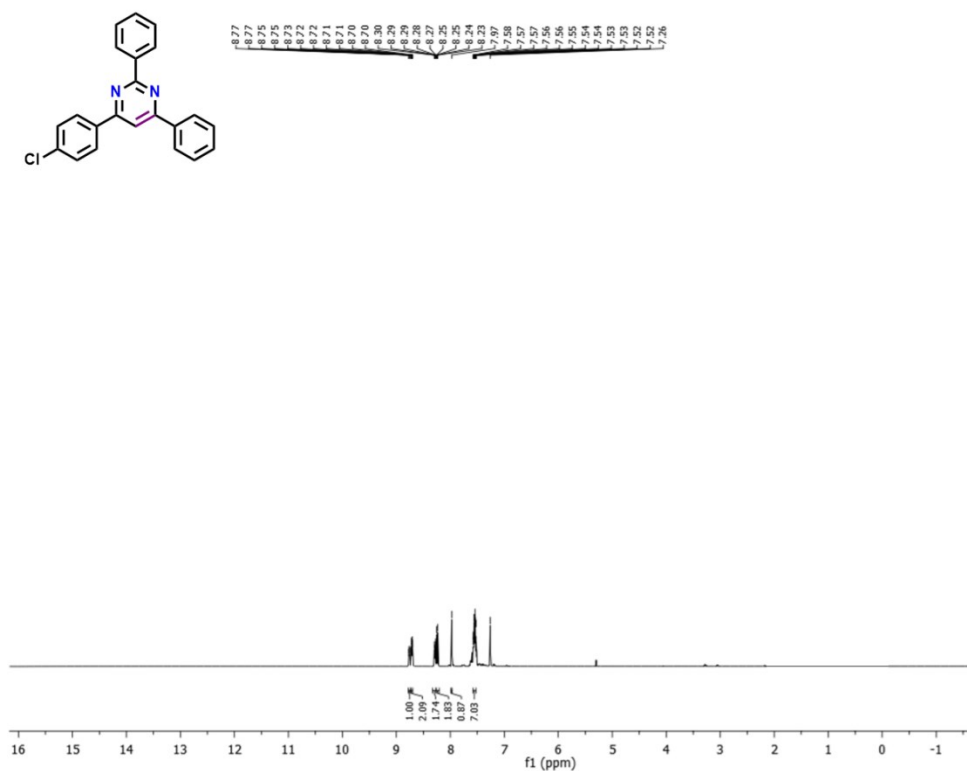

Figure S28. <sup>1</sup>H NMR spectrum (400 MHz) of 3h in CDCl<sub>3</sub>.

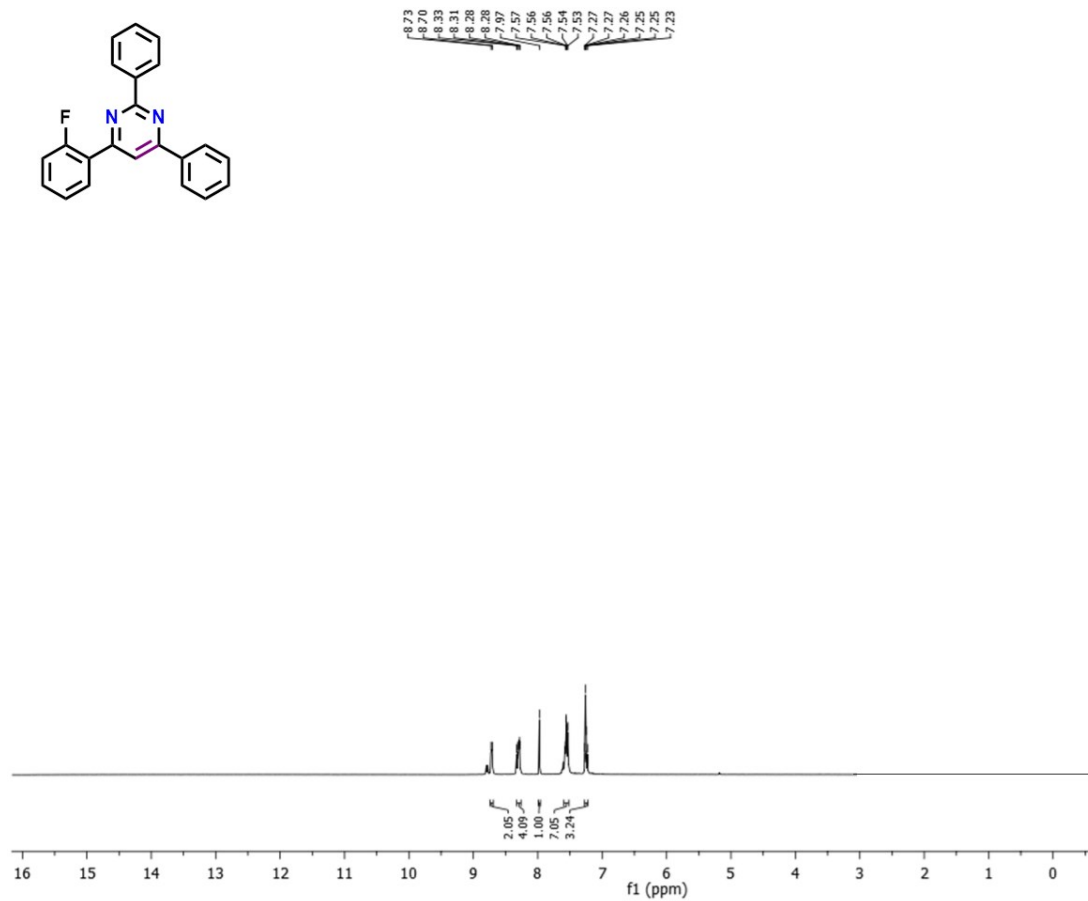

**Figure S29.**  $^1\text{H}$  NMR spectrum (400 MHz) of **3i** in  $\text{CDCl}_3$ .

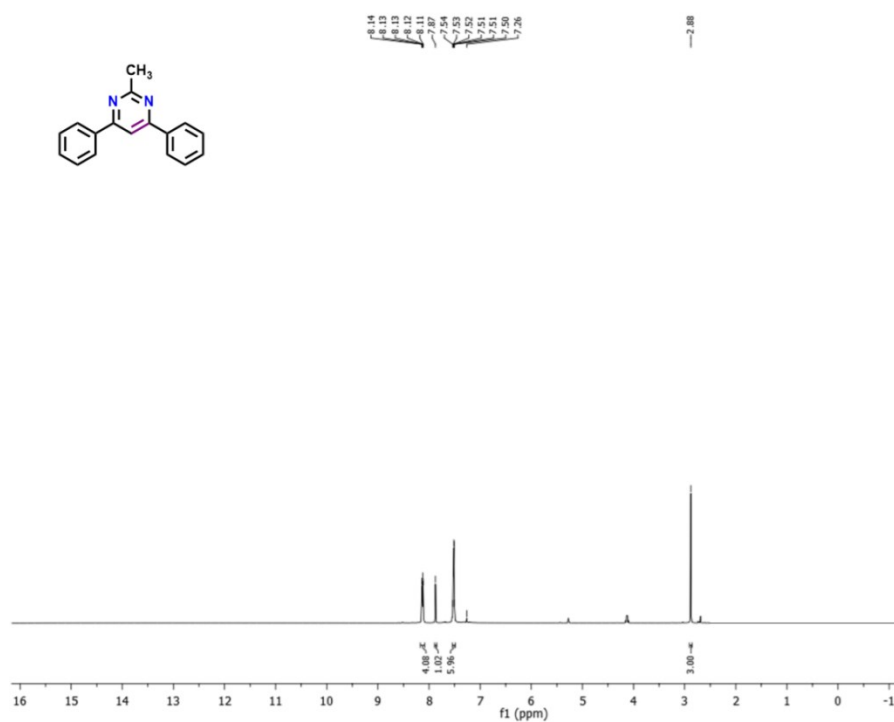

**Figure S30.**  $^1\text{H}$  NMR spectrum (400 MHz) of **3j** in  $\text{CDCl}_3$ .

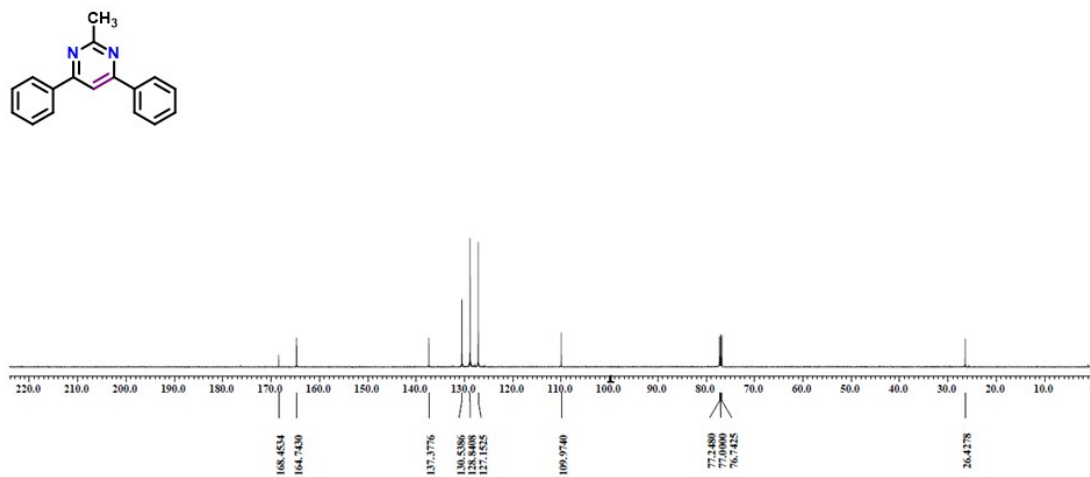

**Figure S31.**  $^{13}\text{C}$  NMR spectrum (100 MHz) of **3j** in  $\text{CDCl}_3$ .

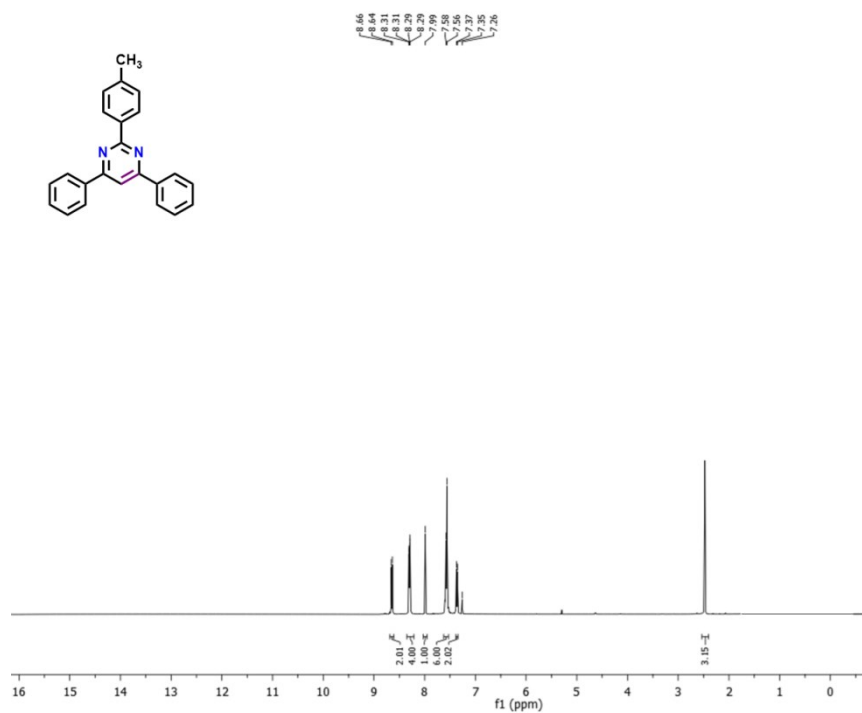

**Figure S32.** <sup>1</sup>H NMR spectrum (400 MHz) of **3k** in CDCl<sub>3</sub>.

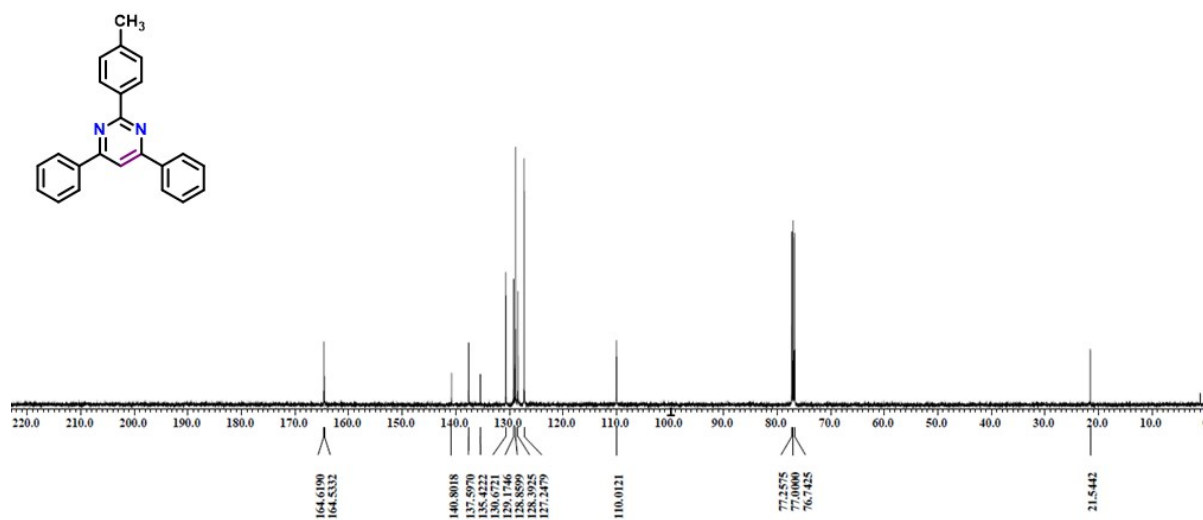

**Figure S33.** <sup>13</sup>C NMR spectrum (100 MHz) of **3k** in CDCl<sub>3</sub>.

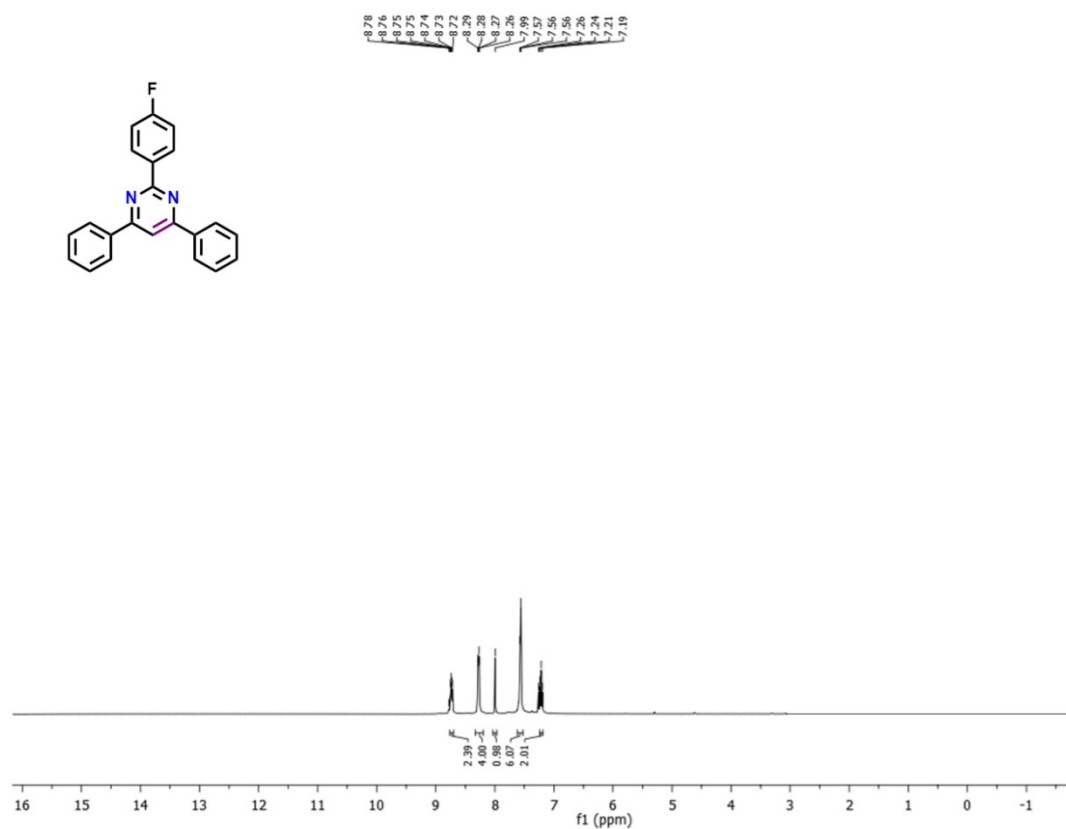

**Figure S34.** <sup>1</sup>H NMR spectrum (400 MHz) of **3l** in CDCl<sub>3</sub>.

## 5. Reference

S1) H. Jenzer, W. Jones, H. Kohler. H, *J. Biol. Chem.* **1986**, 261, 15550-15556.
